# Supplementary material for: A multi-channel device for high-density target-selective stimulation and long-term monitoring of cells and subcellular features in C. elegans
Source: Royal Society of Chemistry journal article supplement (doi:10.1039/c4lc00789a), 2014-01-01

Supplementary fig. 1 Functional verification of phenotypic changes by selective neuronal ablation. a) Simplified neural circuit from mechanosensation to behavior. The circuit is connected with synapses and gap junctions between individual neurons. b) Recovered worm failed forward locomotion when touched posterior body and c) its PLMs showing no GFP signals when re-imaged after blind behavior-test. In contrast, d) another recovered worm responded immediately when touched posterior body and e) re-imaging confirming its intact GFP signal on PLMs.

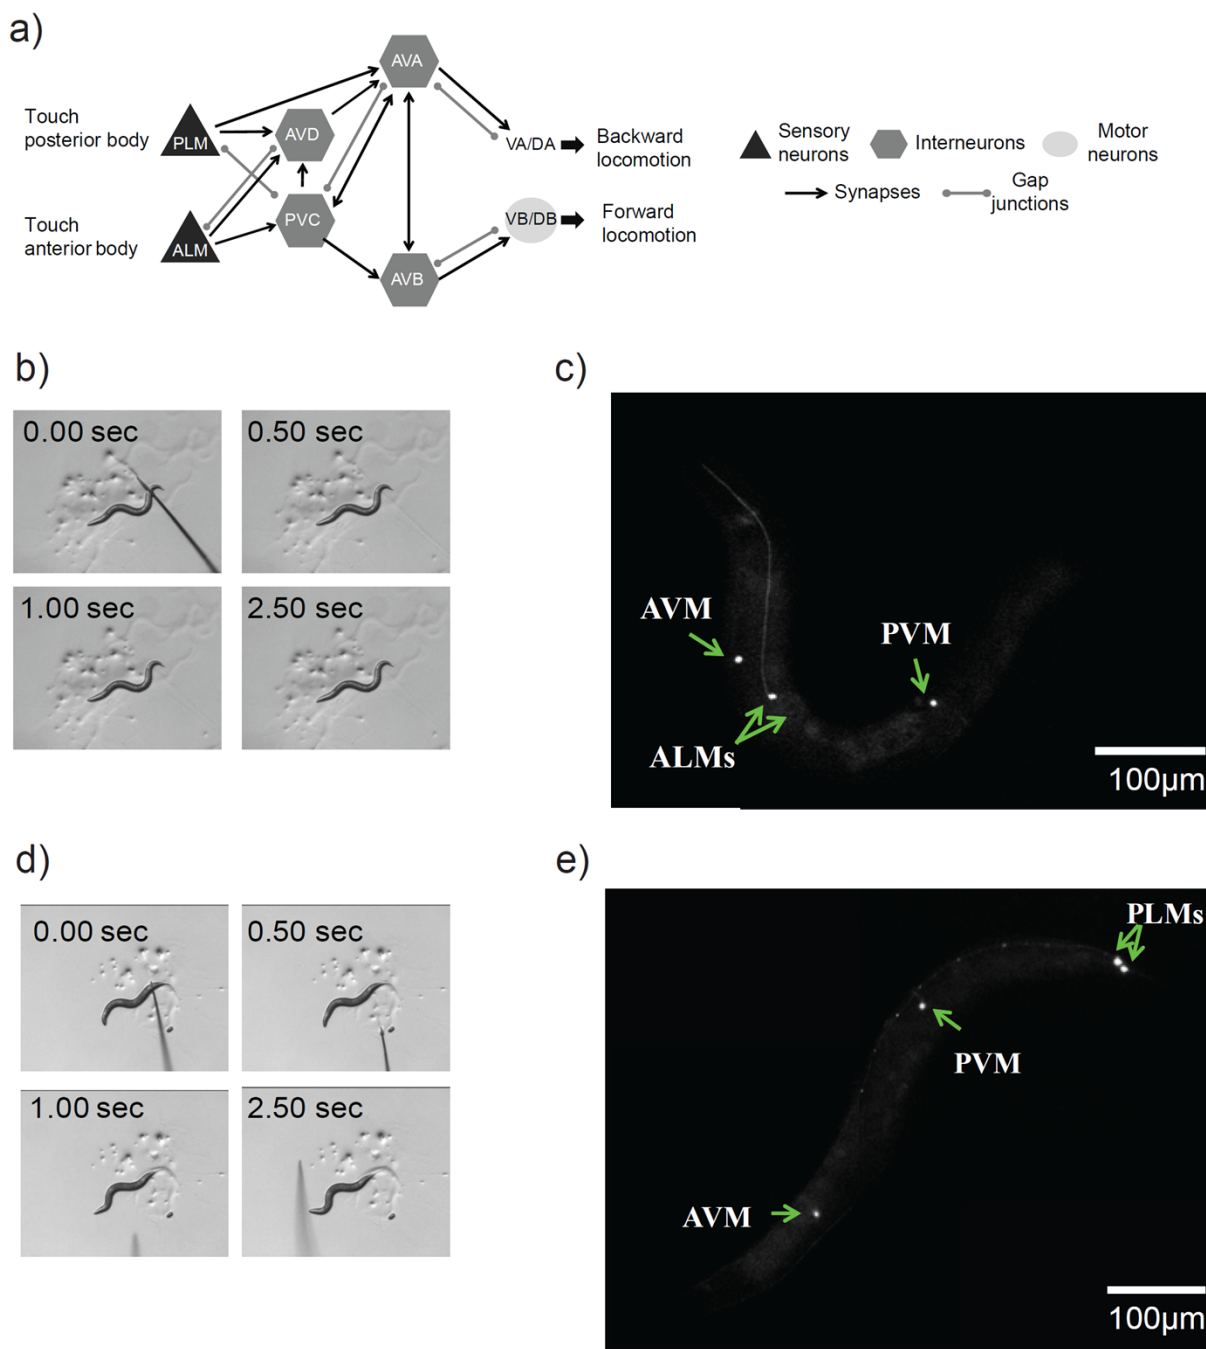

Supplement: c4lc00789a1.pdf [file c4lc00789a1.pdf]
